# Supplementary material
Source: PubMed Central journal article supplement (PMC6628824)
Supplement: pnas.1907472116.sapp.pdf [file pnas.1907472116.sapp.pdf]

Supplementary Information for

## **Non-invasive Preimplantation Genetic Testing for Aneuploidy (niPGT-A) in Spent Medium may be More Reliable than Trophectoderm Biopsy**

Lei Huang<sup>a,b</sup>, Berhan Bogale<sup>b</sup>, Yaqiong Tang<sup>c,d</sup>, Sijia Lu<sup>e</sup>, Xiaoliang Sunney Xie<sup>a,c,d,1</sup>, and Catherine Racowsky<sup>b,1</sup>

<sup>a</sup>Department of Chemistry & Chemical Biology, Harvard University, Cambridge, MA 02138; <sup>b</sup>Department of Obstetrics and Gynecology, Brigham and Women's Hospital, Harvard Medical School, Boston, MA 02115; <sup>c</sup>Beijing Advanced Innovation Center for Genomics (ICG), Peking University, Beijing 100871, China; <sup>d</sup>Biomedical Pioneering Innovation Center (BIOPIC), Peking University, Beijing 100871, China; and <sup>e</sup>Department of Clinical Research, Yikon Genomics Company, Ltd., Shanghai 201499, China.

<sup>1</sup>To whom correspondence should be addressed. E-mail: [sunneyxie@pku.edu.cn](mailto:sunneyxie@pku.edu.cn) (X.S.X.), [cracowsky@bwh.harvard.edu](mailto:cracowsky@bwh.harvard.edu) (C.R.)

**This PDF file includes:**

Fig. S1

Tables S1 to S3

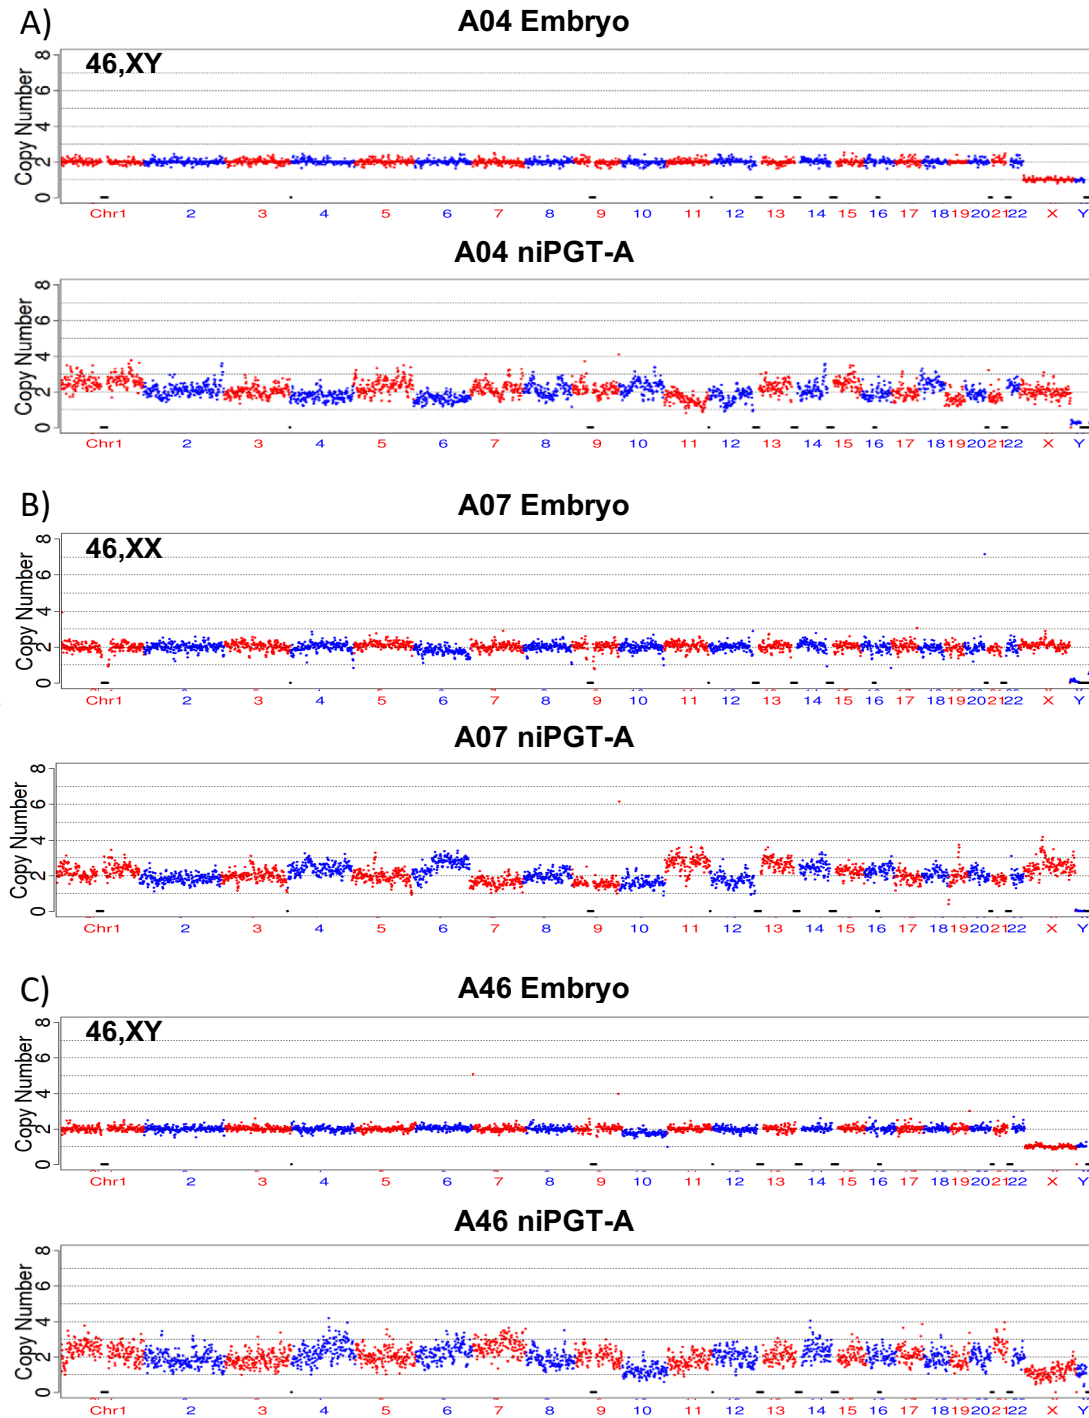

**Fig. S1. Noisy copy number plots of three of the four niPGT-A samples and their corresponding embryos (sequencing depth of  $0.02\times$ ).** Chromosomes are shown in alternating red and blue colors. In all cases, the embryo is euploid and the niPGT-A profiles in A) and B) are similar ( $CV = 0.20$  and  $0.19$ , respectively); in contrast, the niPGT-A profile in C) is much noisier ( $CV = 0.31$ ).

**Table S1. Complete chromosome copy number profiles for niPGT-A, Embryo and TE-biopsy when the percent mosaicism (M) threshold was set at  $\geq 30\%$**

| ID  | Embryo Stage/Grade | Day of Biopsy/Frozen | niPGT-A with M $\geq 30\%$ (the minimum threshold level reported)                                                                                                                                                                                                                                     | Embryo                                                                 | TE-biopsy                                       |
|-----|--------------------|----------------------|-------------------------------------------------------------------------------------------------------------------------------------------------------------------------------------------------------------------------------------------------------------------------------------------------------|------------------------------------------------------------------------|-------------------------------------------------|
| A01 | 5Bb                | D5                   | 46,XY,-<br>5(pter→q31.3,~141M,×1),+10(p12.31→qter,~108M,×3)                                                                                                                                                                                                                                           | 46,XY,-<br>5(pter→q31.3,~142M,×1),+10(p12.2→qter,~111M,×3)             | 46,XY,-<br>5(pter→q33,×1),+10(p13→qter,×3)      |
| A02 | 5Bc                | D5                   | 45,XX,-19(×1),+21(×3,mos,~30%)                                                                                                                                                                                                                                                                        | 46,XX,-19q(×1,mos,~70%)                                                | 45,XX,-19(×1)                                   |
| A03 | 5Bb                | D5                   | 45,XY,-3p(pter→p12.2,~84M,×1),-16(×1)                                                                                                                                                                                                                                                                 | 46,XY,-16(×1)                                                          | 46,XY,-16(×1)                                   |
| A04 | 5Bb                | D5                   | Aneuploidy,XXY#,+X(×2),-<br>Y(×0,mos,~30%),+1(p34.3→qter,~210M,×3,mos,~60%),+<br>5q(q22.3→qter,~66M,×3,mos,~50%),-6(×1,mos,~40%),-<br>11q(q11→qter,~79M,×1,mos,~60%),-<br>12q(q12→q21.2,~39M,×1,mos,~30%),+13(×3,mos,~30%<br>,)+15(pter→q25.3,~66M,×3,mos,~50%),+18(×3,mos,~50%<br>,)-22(×3,mos,~30%) | 46,XY                                                                  | 46,XY,-14q(q32.13-qter,×1)                      |
| A05 | 6Bb                | D5                   | 45,XX,-4(×1)                                                                                                                                                                                                                                                                                          | 45,XX,-4(×1)                                                           | 45,XX,-4(×1)                                    |
| A06 | 6Bc                | D5                   | 46,XX,-22(×1,mos,~50%)                                                                                                                                                                                                                                                                                | 46,XX                                                                  | 45,XX,-13(×1)                                   |
| A07 | 5Bb                | D5                   | Aneuploidy,XX,+X(×3,mos,~50%),+6q(×3,mos,~70%),-<br>7(×1,mos,~40%),-9(×1,mos,~50%),-<br>10q(×1,mos,~50%),+11p(×3,mos,~70%),+11q(q13.4→q2<br>3.3,~43M,×3),+13(×3,mos,~60%),+14(×3,mos,~40%)                                                                                                            | 46,XX                                                                  | 47,XX,+10(×3)                                   |
| A08 | 6Bc                | D5                   | 46,XX,-12p(p13.33→p12.1,~25M,×1)                                                                                                                                                                                                                                                                      | 46,XX,-12p(p13.33→p12.1,~25M,×1)                                       | 46,XX,+8p(pter-p23,×3),-<br>12p(pter→p11.21,×1) |
| A09 | 7Ab                | D5                   | 46,XX,-<br>3q(q21.3→q29,~71M,×1,mos,~40%),+12p(p13.33→p12.<br>1,~25M,×3)                                                                                                                                                                                                                              | 46,XX,+12p(pter→p12.1,~24M,×3)                                         | 46,XX,+8p(pter-p23,×1),-<br>12p(pter→p11.21,×3) |
| A10 | 5Bb                | D5                   | 46,XY,+8q(q21.13→qter,~57M,×3,<br>mos,~30%),+12(p12.3→q24.31,~106M,×3)                                                                                                                                                                                                                                | 46,XY,+12(p12.3→q24.31,~108M,×3)                                       | 46,XY,+8p(pter-<br>p23,×3),+12(p11.2-qter,×3)   |
| A11 | 6Ba                | D6                   | 46,XX,+12p(pter→p11.21,~33M,×3)                                                                                                                                                                                                                                                                       | 46,XX,+12p(pter→p12.1,~24M,×3)                                         | 46,XX,-8p(pter-p23,×1),-<br>12p(pter→p11.21,×3) |
| A12 | 5Ba                | D5                   | 47,XX,-X(×1,mos,~60%),-1p(p31.1→p12,~43M,×1),-<br>1q(×1),-5(×1),+7(×3),-<br>9q(q21.31→q34.3,~59M,×1,mos,~40%),+11(×3,mos,~50%<br>,)-<br>12q(×1,mos,~40%),+13(×3,mos,~40%),+17q(q12→q24.3<br>,~35M,×3,mos,~40%),+21(×3)                                                                                | 46,XX,-1(p31.1→qter,~179M,×1),<br>+7(p21.2→qter,~143M,×3)              | 46,XX,+1(p31.2→qter,×1),<br>+7(p15.2→qter,×3)   |
| A13 | 6Ba                | D5                   | 46,XY,+22(×3,mos,~60%)                                                                                                                                                                                                                                                                                | 47,XY,+22(×3)                                                          | 47,XY,+22(×3)                                   |
| A14 | 5Ba                | D5                   | 46,XY,-1(×1),+7(×3)                                                                                                                                                                                                                                                                                   | 46,XY,-1(×1),+7(×3)                                                    | 46,XY,-1(×1),+7(×3)                             |
| A15 | 6Bc                | D5                   | 46,XY,-1p(pter→p31.1,~74M,×1),7p(pter→p15.3<br>p15.3,~23M,×3)                                                                                                                                                                                                                                         | 46,XY,-1p(pter→p31.1,~74M,×1),<br>7p(pter→p15.3,~23M,×3)               | 46,XY,-1p(pter→p31.1,×1),<br>7p(pter→p15.3,×3)  |
| A16 | 5Bb                | D5                   | 45,XX,-22(×1)                                                                                                                                                                                                                                                                                         | 45,XX,-22(×1)                                                          | 45,XX,-1(×1)                                    |
| A17 | 6Bb                | D5                   | 46,XY,-<br>1(p31.1→qter,~173M,×1),+7(p15.3→qter,~137M,×3)                                                                                                                                                                                                                                             | 46,XY,-1(p31.2→qter,~180M,×1),<br>+7(p21.2→qter,~143M,×3)              | 46,XY,-1(p31.2→qter,×1),<br>+7(p21.2→qter,×3)   |
| A18 | 5Bb                | D5                   | 45,XY,+Y(×2,mos,~40%),-<br>5(×1),+6(pter→q25.3,~161M,×3),+19(×3),+22(×3,mos,~6<br>0%)                                                                                                                                                                                                                 | 47,XY,-<br>5(×1,mos,~70%),+6(×3),+19(×3,mos,~5<br>0%),+22(×3,mos,~60%) | 48,XY,-<br>5(×1),+6(×3),+19(×3),+22(×3)         |
| A19 | 5Bb                | D6                   | 46,XX,+X(×3,mos,~40%),+11(×3),-16(×1)                                                                                                                                                                                                                                                                 | 47,XX,+11(×3),-16q(×1)                                                 | 47,XX,+11(×3),-16(×1)                           |
| A20 | 5Bb                | D5                   | 45,XX,-2(×1)                                                                                                                                                                                                                                                                                          | 45,XX,-2(×1)                                                           | 45,XX,-2(×1)                                    |
| A21 | 6Bb                | D5                   | 46,XY,+X(×2,mos,~30%),-Y(×0,mos,~50%)                                                                                                                                                                                                                                                                 | 46,XY                                                                  | 46,XY                                           |
| A22 | 6Bb                | D5                   | 45,XX,-19(×1)                                                                                                                                                                                                                                                                                         | 46,XX                                                                  | 46,XX                                           |
| A23 | 6Ab                | D5                   | 46,XX                                                                                                                                                                                                                                                                                                 | 46,XX                                                                  | 46,XX                                           |
| A24 | 6Aa                | D5                   | 46,XY                                                                                                                                                                                                                                                                                                 | 46,XY                                                                  | 46,XY                                           |
| A25 | 5Bb                | D6                   | 45,XX,-21(×1)                                                                                                                                                                                                                                                                                         | 45,XX,-21(×1)                                                          | 45,XX,-21(×1)                                   |
| A26 | 5Bc                | D5                   | 45,XY,+19(×3,mos,~70%),-22(×1)                                                                                                                                                                                                                                                                        | 46,XY,+19(×3),-22(×1)                                                  | 46,XY,+19(×3),-22(×1)                           |
| A27 | 5Bc                | D5                   | 47,XX,-1(×1,mos,~50%),+16(×3)                                                                                                                                                                                                                                                                         | 48,XX,+16(×4)                                                          | 48,XX,+16(×3)                                   |
| A28 | 5Bb                | D5                   | 45,XX,-8(×1),+22(×3,mos,~70%)                                                                                                                                                                                                                                                                         | 45,XX,-8(×1)                                                           | 46,XX,-8(×1),+22(×3)                            |
| A29 | 5Bc                | D5                   | 46,XX,-10(×1),+11(×3),-12(×1),-<br>16p(×1,mos,~30%),+21(×3)                                                                                                                                                                                                                                           | 46,XX,-10(×1),+11(×3),-12(×1),+21(×3)                                  | 45,XX,-10(×1),+11(×3),-12(×1)                   |
| A30 | 5Bc                | D5                   | 47,XX,+4(×3),+8(×3,mos,~70%)                                                                                                                                                                                                                                                                          | 46,XX,+4(×3,mos,~70%),+8(×3,mos,~7<br>0%)                              | 48,XX,+4(×3),+8(×3)                             |
| A31 | 5Bb                | D5                   | 44,X,-X(×1),-16(×1)                                                                                                                                                                                                                                                                                   | 44,X,-X(×1),-16(×1)                                                    | Degraded DNA                                    |
| A32 | 5Bc                | D6                   | 46,XY,+13(×3,mos,~40%),+15(×3,mos,~40%),+17q(×3,mo<br>s,~40%),-22(×1,mos,~60%)                                                                                                                                                                                                                        | 46,XY,+13(×3,mos,~30%),+17q(×3,mos<br>,~40%),-22(×1,mos,~60%)          | 45,XY,-22(×1)                                   |
| A33 | 5Cb                | D6                   | 46,XY                                                                                                                                                                                                                                                                                                 | 46,XY                                                                  | 46,XY,-1(pter-p32.3,×1)                         |
| A34 | 5Bb                | D6                   | 45,XY,+Y(×2,mos,~40%),-16(×1,mos,~60%),-18(×1)                                                                                                                                                                                                                                                        | 45,XY,-16q(×1,mos,~50%),-18(×1)                                        | 45,XY,-18(×1)                                   |
| A35 | 6Bb                | D6                   | 47,XX,+16(×3),-18(×1),+22(×3)                                                                                                                                                                                                                                                                         | 46,XX,+16(×3),-18(×1),+22(×3,<br>mos,~60%)                             | 47,XX,+16(×3),-18(×1),+22(×3)                   |

|     |     |    |                                                                                                                                                                              |                        |                                    |
|-----|-----|----|------------------------------------------------------------------------------------------------------------------------------------------------------------------------------|------------------------|------------------------------------|
| A36 | 6Bb | D6 | 45,XY,-22(x1)                                                                                                                                                                | 45,XY,-22(x1)          | 45,XY,-22(x1)                      |
| A37 | 5Bb | D5 | 47,XY,-16p(x1,mos,~30%),+21(x3)                                                                                                                                              | 47,XY,+21(x3)          | 47,XY,+21(x3)                      |
| A38 | 6Ab | D6 | 45,XX,-22(x1)                                                                                                                                                                | 45,XX,-22(x1)          | 45,XX,-22(x1)                      |
| A39 | 6Cc | D6 | 46,XY,-18q(x1,mos,~30%)                                                                                                                                                      | 46,XY                  | No Result                          |
| A40 | 5Bc | D5 | 46,XY,-16q(x1)                                                                                                                                                               | 46,XY                  | 47,XY,Tri/polysomy10,Del/Dup<br>16 |
| A41 | 5Bb | D5 | 46,XY,+3(x3,mos,~70%,-16p(x1,mos,~30%))                                                                                                                                      | 47,XY,+3(x3)           | 47,XY,+3(x3)                       |
| A42 | 5Bc | D5 | 46,XY,-Y(x0,mos,~30%)                                                                                                                                                        | 46,XY                  | 46,XY                              |
| A43 | 6Bb | D6 | 46,XY,-Y(x0,mos,~30%)                                                                                                                                                        | 46,XY                  | 47,XY,+20(x3)                      |
| A44 | 6Bc | D5 | 46,XX,+19q(x3,mos,~70%)                                                                                                                                                      | 46,XX,+19(x3,mos,~70%) | 47,XX,+19(x3)                      |
| A45 | 6Cb | D5 | 46,XX                                                                                                                                                                        | 46,XX                  | 47,XX,+3(x3),+10(x3),-18(x1)       |
| A46 | 6Bb | D5 | Aneuploidy,XY,+1p(p36.13→p11.2,~105M,x3,mos,<br>~60%),+4(x3,mos,~30%),+7(p14.3→qter,~126M,x3,mos,<br>~60%),-<br>10(x1),+14(pter→q24.3,~54M,x3,mos,~40%),+21(x3,mo<br>s,~60%) | 46,XY                  | 47,XY,+10(x3)                      |
| A47 | 7Bb | D5 | 46,XX,-21(x1,mos,~60%)                                                                                                                                                       | 46,XX                  | 47,XX,+22(x3)                      |
| A48 | 5Bb | D5 | 46,XX,-3p(x1,mos,~40%,-16q(x1,mos,~30%))                                                                                                                                     | 46,XX                  | 46,XX                              |
| A49 | 6Bb | D5 | 46,XY,-5(x1,mos,~50%)                                                                                                                                                        | 46,XY                  | 46,XY                              |
| A50 | 6Bb | D5 | Aneuploidy,XY,-X(x0,mos,~50%),-<br>Y(x0,mos,~40%),+4q(x3,mos,~40%,-8q(x1,mos,~50%,-<br>9(x1,mos,~50%),+13(x3,mos,~40%,-14(x1,mos,~60%,-<br>15(x1,mos,~60%)                   | 46,XY                  | 46,XY                              |
| A51 | 5Ab | D5 | 46,XY                                                                                                                                                                        | 46,XY                  | 46,XY                              |
| A52 | 6Bb | D5 | 45,XY,-22(x1)                                                                                                                                                                | 45,XY,-22(x1)          | 45,XY,-22(x1)                      |

**Table S2. Coefficients of variation for embryos identified as male or female by niPGT-A**

| <b>Sex</b>    |             | <b>Mean CV</b> | <b>Autosome CV</b> | <b>Sex Chr X CV</b> | <b>Sex Chr Y CV</b> |
|---------------|-------------|----------------|--------------------|---------------------|---------------------|
| <b>Male</b>   |             |                |                    |                     |                     |
| <b>(n=23)</b> | Mean        | 0.15           | 0.19               | 0.21                | 0.27                |
|               | SD          | 0.03           | 0.03               | 0.04                | 0.11                |
|               | Lower limit | 0.10           | 0.13               | 0.14                | 0.12                |
|               | Upper limit | 0.21           | 0.25               | 0.32                | 0.66                |
| <hr/>         |             |                |                    |                     |                     |
| <b>Sex</b>    |             | <b>Mean CV</b> | <b>Autosome CV</b> | <b>Sex Chr X CV</b> |                     |
| <b>Female</b> |             |                |                    |                     |                     |
| <b>(n=25)</b> | Mean        | 0.17           | 0.20               | 0.19                |                     |
|               | SD          | 0.06           | 0.06               | 0.06                |                     |
|               | Lower limit | 0.10           | 0.12               | 0.12                |                     |
|               | Upper limit | 0.29           | 0.31               | 0.35                |                     |

**Table S3. Performance of niPGT-A when varying the number of non-informative copy number profiles excluded**

| Non-informative samples excluded         | niPGT-A          |                  |                  | TE-biopsy        |
|------------------------------------------|------------------|------------------|------------------|------------------|
|                                          | 0                | 2                | 4                | 2                |
| False positives                          | 7                | 5                | 3                | 9                |
| False positive rate                      | 36.8%<br>(7/19)  | 29.4%<br>(5/17)  | 20.0%<br>(3/15)  | 50.0%<br>(9/18)  |
| PPV                                      | 82.5%<br>(33/40) | 86.8%<br>(33/38) | 91.7%<br>(33/36) | 78.0%<br>(32/41) |
| % Concordance of embryo ploidy           | 86.5%<br>(45/52) | 90.0%<br>(45/50) | 93.8%<br>(45/48) | 82.0%<br>(41/50) |
| % Concordance of chromosome copy numbers | 76.9%<br>(40/52) | 80.0%<br>(40/50) | 83.3%<br>(40/48) | 62.0%<br>(31/50) |
